# Supplementary material for: Operando measurement of electrocatalyst potential on particulate photocatalysts for overall water splitting
Source: Royal Society of Chemistry journal article supplement (doi:10.1039/d4ta02571g), 2024-01-01
Supplement: d4ta02571g1.pdf [file d4ta02571g1.pdf]

## Supporting Information

# Operando measurement of electrocatalyst potential on particulate photocatalyst for overall water splitting

*Yudai Kawase,* <sup>a</sup> *Keisuke Obata,* <sup>a</sup> *Yuu Shioiri,* <sup>a</sup> *Tomohiro Higashi,* <sup>b</sup> and *Kazuhiro Takanabe*\*<sup>a</sup>

<sup>a</sup> Department of Chemical System Engineering, School of Engineering, The University of Tokyo, 7-3-1 Hongo, Bunkyo-ku, Tokyo 113-8656, Japan.

<sup>b</sup> Institute for Tenure Track Promotion, University of Miyazaki, 1-1 Gakuen-kibanadai-nishi, Miyazaki, 889-2192, Japan.

\* [takanabe@chemsys.t.u-tokyo.ac.jp](mailto:takanabe@chemsys.t.u-tokyo.ac.jp)

**Fig. S1 – S16**

**Table S1 – S3**

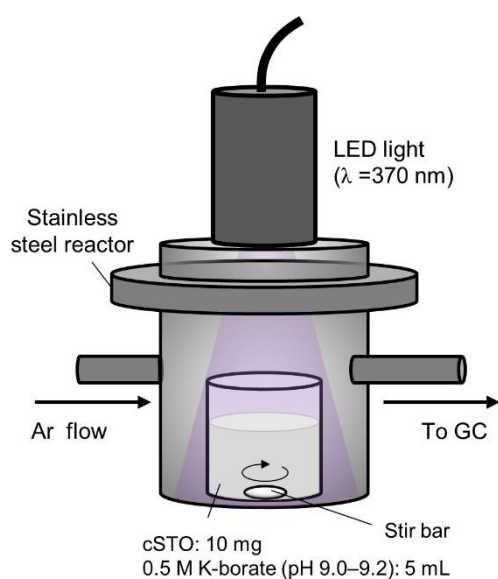

**Fig. S1.** Schematic illustration of a reactor for photocatalytic water splitting.

**Table S1.** The light intensity and the photon number of LED light used in this study.

| Light intensity / $\text{mW cm}^{-2}$ | Photon / $\mu\text{mol h}^{-1} \text{cm}^{-2}$ | Photon number / $\text{photon h}^{-1} \text{cm}^{-2}$ |
|---------------------------------------|------------------------------------------------|-------------------------------------------------------|
| 12                                    | $1.3 \times 10^2$                              | $8.0 \times 10^{19}$                                  |
| 30                                    | $3.3 \times 10^2$                              | $2.0 \times 10^{20}$                                  |
| 59                                    | $6.7 \times 10^2$                              | $4.0 \times 10^{20}$                                  |
| 94                                    | $1.1 \times 10^3$                              | $6.4 \times 10^{20}$                                  |
| $1.2 \times 10^2$                     | $1.3 \times 10^3$                              | $8.1 \times 10^{20}$                                  |

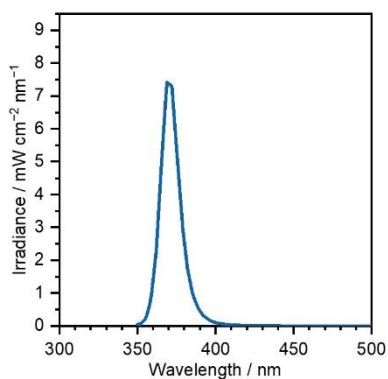

**Fig. S2.** The measured irradiance spectrum of the LED light used in this study. The integrated value is  $1.2 \times 10^2 \text{ mW cm}^{-2}$ .

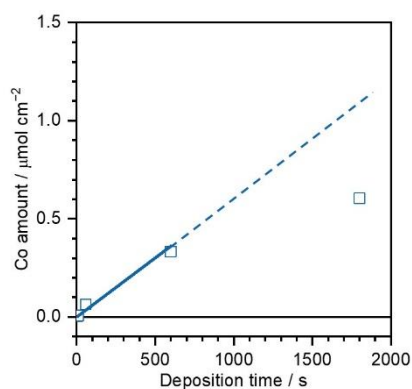

**Fig. S3.** The relationship between Co loading amount on FTO substrates and electrodeposition time. The CoOOH deposition on FTO substrates was conducted by CP at  $0.5 \text{ mA cm}^{-2}$  for 5, 10, 60, 600, or 1800 s in  $0.1 \text{ M Co(NO}_3)_2$  aqueous solution. After deposition, CoOOH/FTO was immersed in  $0.1 \text{ M HNO}_3$  (super special grade, Wako) and ultrasonicated to dissolve all Co species. Finally, the solution was diluted in  $0.01 \text{ M HNO}_3$  for ICP–OES analysis.

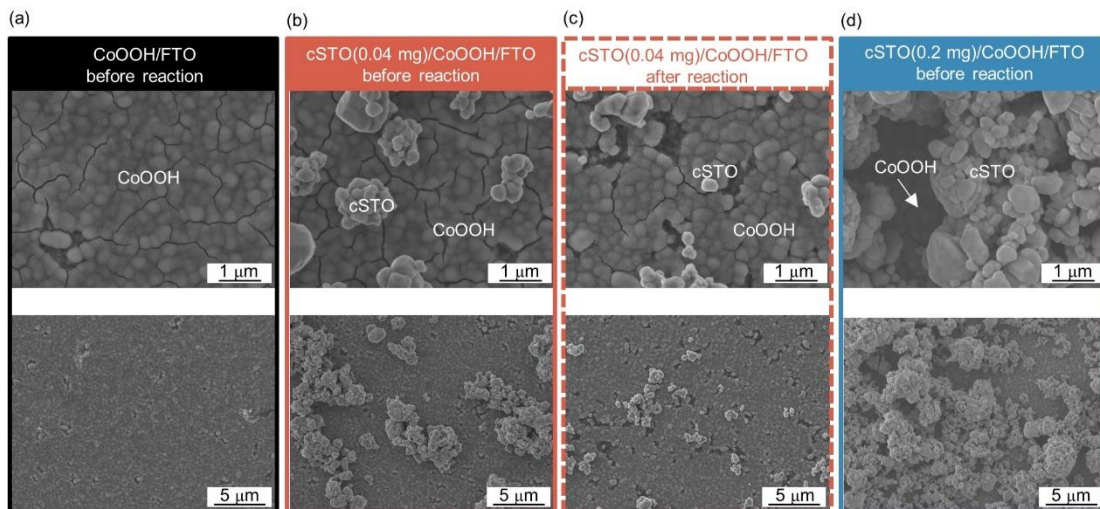

**Fig. S4.** Top-view SEM images of (a) CoOOH/FTO, (b) cSTO(0.04 mg)/CoOOH/FTO, (c) cSTO(0.04 mg)/CoOOH/FTO after the reaction, and (d) cSTO(0.2 mg)/CoOOH/FTO, respectively. The loading amount of CoOOH on FTO substrates is  $0.4 \mu\text{mol cm}^{-2}$ .

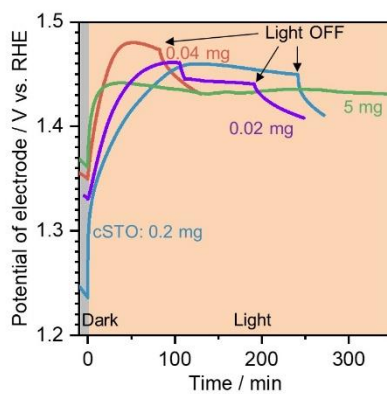

**Fig. S5.** OCP of 0.02, 0.04, 0.2, and 5 mg cSTO loaded on CoOOH electrode as a function of time. Light source was LED light ( $\lambda = 370 \text{ nm}$ ,  $59 \text{ mW cm}^{-2}$ ).

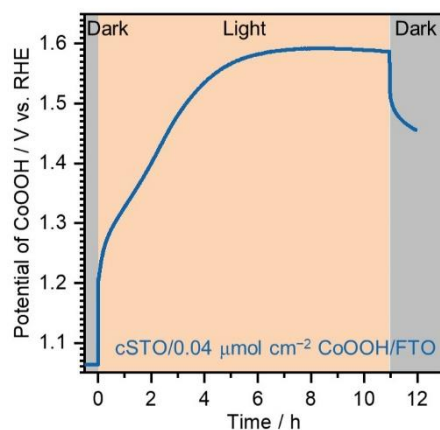

**Fig. S6.** Long-term measurement of OCP of  $\text{cSTO}/0.04 \mu\text{mol cm}^{-2} \text{CoOOH/FTO}$  electrode in 0.5 M K-borate (pH 9.0–9.2) under LED illumination ( $\lambda = 370 \text{ nm}$ ,  $59 \text{ mW cm}^{-2}$ ). WE:  $\text{cSTO}/0.04 \mu\text{mol cm}^{-2} \text{CoOOH/FTO}$  electrode, RE:  $\text{Hg/Hg}_2\text{Cl}_2$  (sat. KCl).

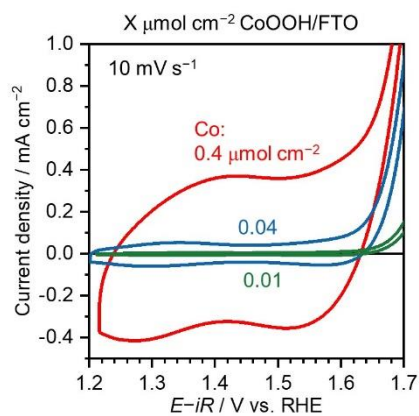

**Fig. S7.** The results of CV for  $\text{CoOOH/FTO}$  electrodes under dark condition. WE:  $\text{CoOOH/FTO}$  electrode, RE:  $\text{Hg/Hg}_2\text{Cl}_2$  (sat. KCl), CE: Pt wire, electrolyte: 0.5 M K-borate (pH 9.0–9.2).

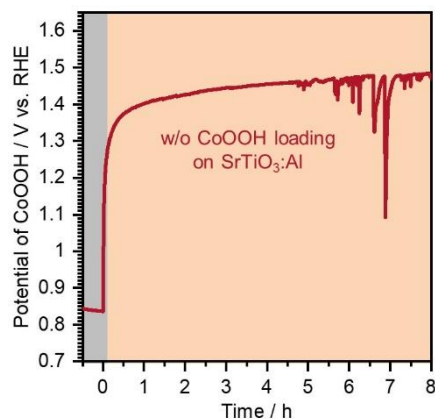

**Fig. S8.** OCP of Rh (0.1 wt%)/Cr<sub>2</sub>O<sub>3</sub> (0.05 wt%)/SrTiO<sub>3</sub>:Al (without CoOOH pre-loading)/CoOOH electrode in 0.5 M K-borate (pH 9.0–9.2) under LED illumination ( $\lambda = 370$  nm,  $59$  mW cm<sup>-2</sup>). RE: Hg/Hg<sub>2</sub>Cl<sub>2</sub> (sat. KCl). It took over 7 h for the OCP to stabilize, a longer time than in **Fig. 3a**.

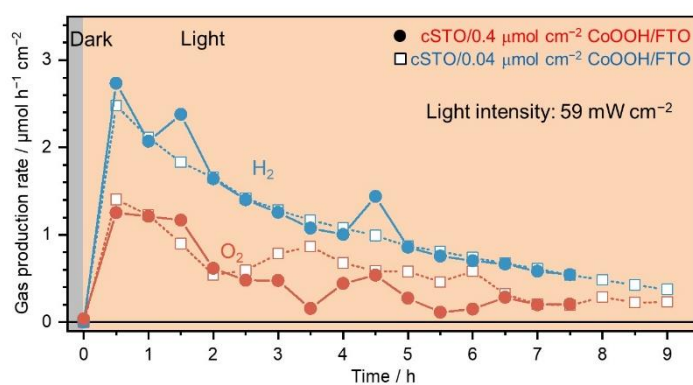

**Fig. S9.** Time course of detected gas production rate of cSTO/0.04  $\mu\text{mol cm}^{-2}$  CoOOH/FTO or cSTO/0.4  $\mu\text{mol cm}^{-2}$  CoOOH/FTO electrode in 0.5 M K-borate (pH 9.0–9.2) under LED light illumination ( $\lambda = 370$  nm,  $59$  mW cm<sup>-2</sup>). WE: cSTO/CoOOH/FTO electrode, RE: Hg/Hg<sub>2</sub>Cl<sub>2</sub> (sat. KCl).

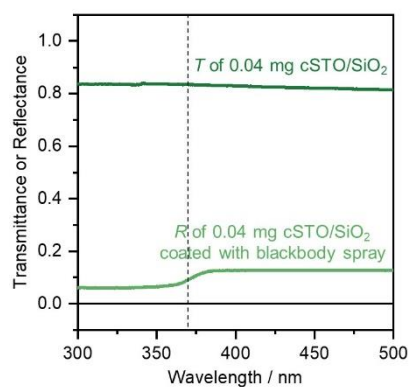

**Fig. S10.** UV–vis transmission and reflection spectra of 0.04 mg cSTO/SiO<sub>2</sub>. Only for reflection spectrum, the SiO<sub>2</sub> substrate was coated with blackbody spray.

**Table S2.** Apparent quantum yield (AQY) and internal quantum yield (IQY) of attempted photocatalytic systems. All systems use 0.5 M K-borate (pH 9.0–9.2) as an electrolyte and LED light ( $\lambda$ : 370 nm, 59 mW cm<sup>-2</sup>) as a light source.

| Photocatalyst structure                     | AQY / % | IQY / % |
|---------------------------------------------|---------|---------|
| cSTO powder                                 | 15      | -       |
| cSTO/0.04 $\mu\text{mol cm}^{-2}$ CoOOH/FTO | 0.7     | 11      |
| cSTO/0.4 $\mu\text{mol cm}^{-2}$ CoOOH/FTO  | 0.8     | 12      |

**Table S3.** Photocurrent density and measured surface hole quasi-Fermi level ( $E_{f,h}$ ) using SrTiO<sub>3</sub>.

| Condition                                     | Photocurrent density /<br>$\mu\text{A cm}^{-2}$ | $E_{f,h}$ / V vs. RHE | Electrolyte                    | Light source                                                |                     |
|-----------------------------------------------|-------------------------------------------------|-----------------------|--------------------------------|-------------------------------------------------------------|---------------------|
| Open circuit                                  | 7*                                              | 1.56–1.59             | 0.5 M K-borate (pH<br>9.0–9.2) | LED light ( $\lambda$ : 370 nm, 59 mW<br>$\text{cm}^{-2}$ ) | This study          |
| Open circuit                                  | ~0                                              | ~0.5                  | 0.1 M K-phosphate (pH<br>7)    | ultraviolet lamp (10 mW $\text{cm}^{-2}$ )                  | ref <sup>[S2]</sup> |
| Short circuit ( $E_{f,e} = 0.3$<br>V vs. RHE) | ~100                                            | ~0.9                  |                                |                                                             |                     |

\*The photocurrent density is estimated from the measured OCP of cSTO/CoOOH/FTO electrode and the  $j$ - $E$  curve of CoOOH/FTO electrode under dark condition.



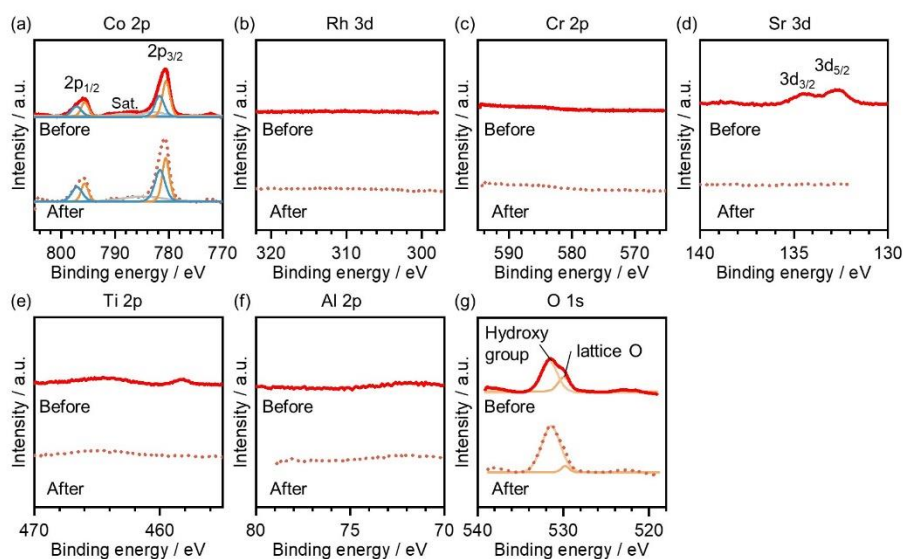

**Fig. S11.** XPS spectra of (a) Co 2p, (b) Rh 3d, (c) Cr 2p, (d) Sr 3d, (e) Ti 2p, (f) Al 2p, and (g) O 1s of cSTO/0.4  $\mu\text{mol cm}^{-2}$  CoOOH/FTO before and after the reaction test. Co  $2p_{1/2}$  and Co  $2p_{3/2}$  peaks centered at the binding energy of 796 and 781 eV were observed. By the deconvolution of Co  $2p_{3/2}$  spectra, two peaks centered at 780.5 and 781.7 eV were found. These peak positions are well consistent with previously reported CoOOH XPS spectra.<sup>S3</sup>

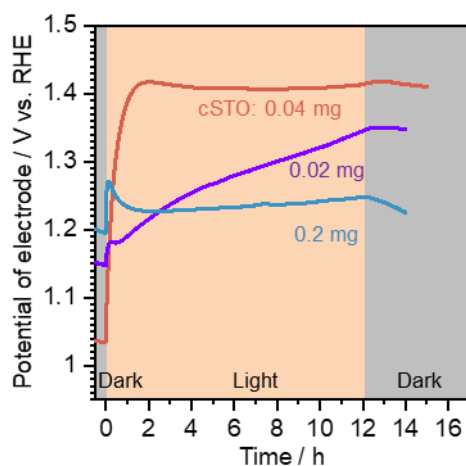

**Fig. S12.** OCP transients of cSTO (0.02, 0.04, and 0.2 mg) /0.4  $\mu\text{mol cm}^{-2}$  CoOOH/FTO electrode measured in 0.5 M K-borate (pH 9.0–9.2). Light source was solar simulator equipped with AM1.5G filter ( $100 \text{ mW cm}^{-2}$ , 1 sun). WE: cSTO (0.02, 0.04, and 0.2 mg)/ 0.4  $\mu\text{mol cm}^{-2}$  CoOOH/FTO electrode, RE: Hg/Hg<sub>2</sub>Cl<sub>2</sub> (sat. KCl).

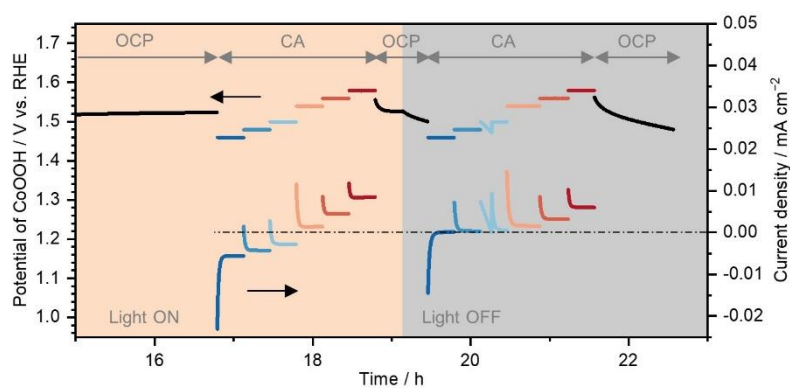

**Fig. S13.** The measured potential and produced current of cSTO/ $0.4 \mu\text{mol cm}^{-2}$  CoOOH/FTO in 0.5 M K-borate (pH 9.0–9.2) under open circuit condition and CA. WE: cSTO/CoOOH/FTO electrode, RE: Hg/Hg<sub>2</sub>Cl<sub>2</sub> (sat. KCl), CE: coiled-Pt wire, light source: LED light ( $\lambda = 370 \text{ nm}$ ,  $59 \text{ mW cm}^{-2}$ ).

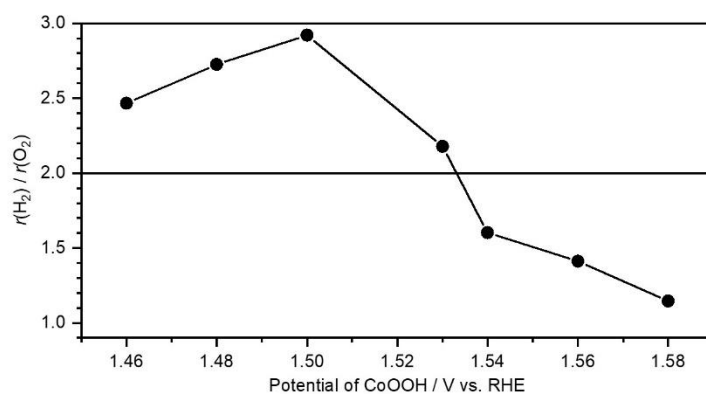

**Fig. S14.** The ratio of  $r(\text{H}_2)$  to  $r(\text{O}_2)$  at various electrode potentials. WE: cSTO/ $0.4 \mu\text{mol cm}^{-2}$  CoOOH/FTO electrode, RE: Hg/Hg<sub>2</sub>Cl<sub>2</sub> (sat. KCl), CE: coiled-Pt wire, electrolyte: 0.5 M K-borate (pH 9.0–9.2), light source: LED light ( $\lambda = 370 \text{ nm}$ ,  $59 \text{ mW cm}^{-2}$ ).

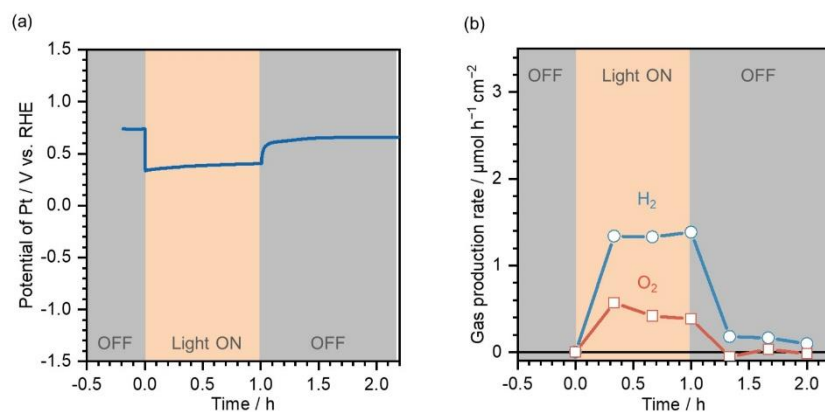

**Fig. S15.** (a) OCP and (b) gas production rate of CrO<sub>x</sub>/cSTO/Pt electrode in 0.5 M K-borate (pH 9.0–9.2) under LED illumination ( $\lambda = 370 \text{ nm}$ ,  $59 \text{ mW cm}^{-2}$ ). WE: CrO<sub>x</sub>/cSTO/Pt electrode, RE: Hg/Hg<sub>2</sub>Cl<sub>2</sub> (sat. KCl).

Pt foil (99.95%,  $t = 0.05 \text{ mm}$ , The Nilaco Corporation) was cut to  $10 \text{ mm} \times 30 \text{ mm}$  and polished with  $1 \text{ }\mu\text{m}$  of diamond and with  $0.05 \text{ }\mu\text{m}$  of alumina (both purchased from BAS, Inc.).  $0.04 \text{ mg}$  of cSTO was drop-cast on a Pt foil (cSTO/Pt). cSTO/Pt was immersed in  $50 \text{ mM K}_2\text{CrO}_4$  (FUJIFILM Wako Pure Chemical Corporation) aqueous solution for  $30 \text{ min}$  with H<sub>2</sub> bubbling to obtain CrO<sub>x</sub>-coated cSTO/Pt (CrO<sub>x</sub>/cSTO/Pt).<sup>S1</sup>

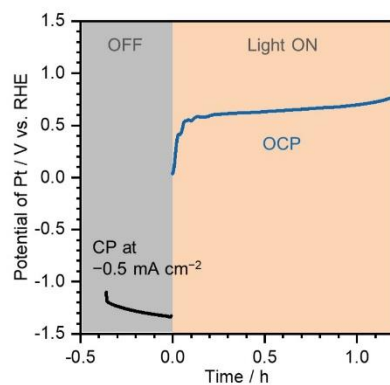

**Fig. S16.** The measured potential of CrO<sub>x</sub>/cSTO/Pt electrode in 0.5 M K-borate (pH 9.0–9.2) under CP (at  $-0.5 \text{ mA cm}^{-2}$ ) and open circuit condition. WE: CrO<sub>x</sub>/cSTO/Pt electrode, RE: Hg/Hg<sub>2</sub>Cl<sub>2</sub> (sat. KCl), CE: coiled-Pt wire, light source: LED light ( $\lambda = 370 \text{ nm}$ ,  $59 \text{ mW cm}^{-2}$ ).

### Reference

- [S1] M. Qureshi, T. Shinagawa, N. Tsiapis, and K. Takanabe, *ACS Sustainable Chem. Eng.* 2017, **5**, 8079–8088.
- [S2] R. Chen, D. Zhang, Z. Wang, D. Li, L. Zhang, X. Wang, F. Fan and C. Li, *J. Am. Chem. Soc.*, 2023, 145, 4667–4674.
- [S3] J. Yang, H. Liu, W. N. Martens, and R. L. Frost, *J. Phys. Chem. C*, 2010, **114**, 111–119.
